# Supplementary material for: Screening for New Surface Anchoring Domains for Lactococcus lactis
Source: Front Microbiol. 2019 Aug 13;10:1879. doi: 10.3389/fmicb.2019.01879 (PMC6700490; doi:10.3389/fmicb.2019.01879)
Supplement: Supplementary file 2 [file Data_Sheet_2.xlsx]

## Sheet: Lactococ. LPXTG cov. anch. dom.
LPXTG covalent anchoring domains in the genome of Lactococcus lactis ssp. cremoris NZ9000
Accession number	Locus tag	Product Name	LPXTG motif	Used as anchor	Anchor abbreviation	Plasmid
ADJ59890.1	LLNZ_04515	putative secreted protein	LSKNN
ADJ59930.1	LLNZ_04715	hypothetical protein LLNZ_04715	LPKTG
ADJ60132.1	LLNZ_05825	cell wall surface anchor family protein	LPATG
ADJ60156.1	LLNZ_05945	hypothetical protein LLNZ_05945	LPETG
ADJ60301.1	LLNZ_06755	hypothetical protein LLNZ_06755	LPIVG
ADJ60390.1	LLNZ_07210	cell surface antigen I/II precursor (CluA)	LPKTG	812..1243, 1070..1243	lLPXTG, sLPXTG	pSD-sLPXTG, pSD-lLPXTG
ADJ60494.1	LLNZ_07750	hypothetical protein LLNZ_07750	LPITG
ADJ60780.1	LLNZ_09270	hypothetical protein LLNZ_09270	LPKTG
ADJ60782.1	LLNZ_09280	hypothetical protein LLNZ_09280	LPFTG
ADJ61431.1	LLNZ_12740	hypothetical protein LLNZ_12740	LPSTG

## Sheet: PFAM non-cov. anch. dom
Non-covalent surface anchoring domains according to Pfam classification and their representation across different phyla of bacteria
Domain name	PFAM number	Actinobacteria	Bacteroidetes	Firmicutes	Proteobacteria	Other phyla	All bacterial species
Cpl-7	PF08230	43	2	98	0	1	144
CW_binding_1	PF01473	37	0	306	1	2	346
SH3_5	PF08460	2	2	136	2	1	143
SH3_3	PF08239	289	446	939	1414	659	3747
WxL	PF13731	22	1	172	0	6	201
CW_binding_2	PF04122	102	0	126	0	4	232
ChW	PF07538	63	3	98	37	22	223
PG_binding_1	PF01471	861	355	987	1880	725	4808
PG_binding_2	PF08823	70	1	81	17	43	212
PG_binding_3	PF09374	4	63	6	653	35	761
PG_binding_4	PF12229	482	2	612	7	456	1559
SLAP	PF03217	1	0	51	0	0	52
LysM	PF01476	915	692	1114	2315	1448	6484

## Sheet: Lactococcal non-cov. anch. dom.
Non-covalent anchoring domains in the genome of Lactococcus lactis ssp. cremoris NZ9000
Accession number	Locus tag	Product Name	Abbreviation	PFAM number	Domain	1st repeat	2nd repeat	3rd repeat	Used as anchor	Anchor abbreviation	Plasmid
WP_011835448	LLNZ_08350	ATP-binding cassette domain-containing protein		PF01476	LysM	424..466
WP_011834544	LLNZ_02615	hypothetical protein		PF01473	CW_1				69..88	N-CW	pSD-CW
WP_011834816	LLNZ_04380	LysM peptidoglycan-binding domain-containing protein		PF01183	LysM	331..373	385..429		331..429	C-2Lys	pSD-2LysM
WP_011834719	LLNZ_03805	LysM domain-containing protein		PF01476	LysM	120..169
WP_011834547	LLNZ_02630	LysM peptidoglycan-binding domain-containing protein	AcmD	PF01476	LysM	194..237	259..302	321..361	194..361	C-AcmD	pSD-3LysM
WP_011834353	LLNZ_01465	LysM peptidoglycan-binding domain-containing protein	AcmA	PF01476	LysM	245..287	321..363	395..437	224..437	C-AcmA	pSDBA3b
WP_011834746	LLNZ_03955	transglycosylase		PF06737	Cpl-7	32..73			32..73	N-CPL	pSD-Cpl
WP_011835003	LLNZ_05665	WxL domain-containing protein	Wxl1	PF13731	WxL	6..242			6..242	C-WxL1	pSD-WxL1
WP_011835291	LLNZ_07390	hypothetical protein		PF13731	WxL
WP_011834869	LLNZ_04735	WxL domain-containing protein	Wxl2	PF13731	WxL	25..245
WP_011676619	LLNZ_04730	WxL domain-containing protein	Wxl3	PF13731	WxL	31..259			31..259	C-WxL1	pSD-WxL3
WP_011834870	LLNZ_04740	WxL domain-containing protein		PF13731	WxL	29..247

## Sheet: Phage non-cov. anch. dom.
Phage name		Endoysin accession number	PFAM number	Domain	1st repeat	2nd repeat	3rd repeat	Used as anchor	Anchor abbreviation	Plasmid
Lactococcus phage sk1		NP_044966						147..246	C-SK1	pSD-SK
Lactococcus phage jj50		YP_764334
Lactococcus phage 62503		ANT43698	PF01476	LysM	224..429	333..374	387..427
Lactococcus phage AM12		ARQ95638						150..344	C-AM12	pSD-AM12
Lactococcus phage AM9		ARM67272
Lactococcus phage AM7		ARM66124						137..249	C-AM7	pSD-AM7
Lactococcus phage LW4		ARM65941
Lactococcus phage R31		ARM65572
Lactococcus phage 1358		YP_009140409	PF08460	SH3_5	158..219			158..219	C-1358	pSD-1358
Lactococcus phage Q54		YP_762603
Lactococcus phage phiAM2		AAG24366	PF01476	LysM	224..429	333..374	387..427
Lactococcus phage phi-vML3		P62693
Lactococcus phage jm2		YP_008320104
Lactococcus phage 340		YP_008318114
Lactococcus phage P087		YP_002875753
Lactococcus phage phismq86		ABD63898
Lactococcus phage P335		NP_839940
